# Supplementary material for: Analytical Evaluation of Visby Medical RT-PCR Portable Device for Rapid Detection of SARS-CoV-2
Source: MDPI journal article supplement (doi:10.3390/diagnostics11050813), 2021-04-29
Supplement: s1 [file s1]

| Device No. | Cobas CT E gene | VISBY Result | VISBY Repetition | Concordance | Cobas Repetition | GeneXpert N / E gene |
|------------|-----------------|--------------|------------------|-------------|------------------|----------------------|
| 1          | 16              | POS          |                  | C           |                  |                      |
| 2          | 17              | POS          |                  | C           |                  |                      |
| 3          | 17              | POS          |                  | C           |                  |                      |
| 4          | 18              | POS          |                  | C           |                  |                      |
| 5          | 18              | POS          |                  | C           |                  |                      |
| 6          | 19              | POS          |                  | C           |                  |                      |
| 7          | 19              | POS          |                  | C           |                  |                      |
| 8          | 19              | POS          |                  | C           |                  |                      |
| 9          | 19              | POS          |                  | C           |                  |                      |
| 10         | 19              | POS          |                  | C           |                  |                      |
| 11         | 20              | POS          |                  | C           |                  |                      |
| 12         | 21              | POS          |                  | C           |                  |                      |
| 13         | 21              | POS          |                  | C           |                  |                      |
| 14         | 21              | POS          |                  | C           |                  |                      |
| 15         | 21              | INV          | POS              | C           |                  |                      |
| 16         | 21              | POS          |                  | C           |                  |                      |
| 17         | 21              | POS          |                  | C           |                  |                      |
| 18         | 22              | POS          |                  | C           |                  |                      |
| 19         | 22              | POS          |                  | C           |                  |                      |
| 20         | 22              | POS          |                  | C           |                  |                      |
| 21         | 23              | POS          |                  | C           |                  |                      |
| 22         | 23              | POS          |                  | C           |                  |                      |
| 23         | 23              | POS          |                  | C           |                  |                      |
| 24         | 24              | POS          |                  | C           |                  |                      |
| 25         | 25              | POS          |                  | C           |                  |                      |
| 26         | 25              | POS          |                  | C           |                  |                      |
| 27         | 25              | POS          |                  | C           |                  |                      |
| 28         | 27              | POS          |                  | C           |                  |                      |
| 29         | 29              | POS          |                  | C           |                  |                      |
| 30         | 29              | POS          |                  | C           |                  |                      |
| 31         | 30              | POS          |                  | C           |                  |                      |
| 32         | 31              | POS          |                  | C           | 31               |                      |
| 33         | 31              | NEG          | NEG              | NC          | 31               |                      |
| 34         | 33              | POS          |                  | C           | 35               |                      |
| 39         | 27              | POS          |                  | C           |                  |                      |
| 40         | 17              | POS          |                  | C           |                  |                      |
| 41         | 16              | POS          |                  | C           |                  |                      |
| 42         | 19              | POS          |                  | C           |                  |                      |
| 43         | 26              | POS          |                  | C           |                  |                      |
| 44         | 17              | POS          |                  | C           |                  |                      |
| 45         | 17              | POS          |                  | C           |                  |                      |
| 46         | 32              | POS          |                  | C           | 33               |                      |
| 47         | 22              | POS          |                  | C           |                  |                      |
| 48         | 18              | POS          |                  | C           |                  |                      |
| 49         | 25              | POS          |                  | C           |                  |                      |
| 50         | 17              | POS          |                  | C           |                  |                      |
| 51         | 26              | POS          |                  | C           |                  |                      |
| 52         | 23              | POS          |                  | C           |                  |                      |
| 53         | 25              | POS          |                  | C           |                  |                      |
| 54         | 21              | POS          |                  | C           |                  |                      |
| 55         | 20              | POS          |                  | C           |                  |                      |
| 56         | 21              | POS          |                  | C           |                  |                      |
| 57         | 26              | POS          |                  | C           |                  |                      |
| 58         | 34              | POS          |                  | C           | 34               |                      |
| 59         | 32              | POS          |                  | C           | 34               |                      |
| 60         | 34              | NEG          |                  | NC          | 34               | 37.8 / 34.5          |
| 61         | 0               | NEG          |                  | C           |                  |                      |
| 62         | 0               | NEG          |                  | C           |                  |                      |
| 63         | 0               | NEG          |                  | C           |                  |                      |
| 64         | 0               | NEG          |                  | C           |                  |                      |
| 65         | 0               | NEG          |                  | C           |                  |                      |
| 75         | 32              | NEG          |                  | NC          |                  | 35.1 / 31.9          |
| 76         | 33              | POS          |                  | C           |                  |                      |
| 77         | 34              | POS          |                  | C           |                  |                      |
| 79         | 24              | POS          |                  | C           |                  |                      |
| 83         | 34              | POS          |                  | C           |                  |                      |
| 84         | 0               | NEG          |                  | C           |                  |                      |
| 85         | 0               | NEG          |                  | C           |                  |                      |
| 86         | 0               | NEG          |                  | C           |                  |                      |
| 87         | 0               | NEG          |                  | C           |                  |                      |
| 88         | 0               | NEG          |                  | C           |                  |                      |
| 89         | 0               | NEG          |                  | C           |                  |                      |
| 90         | 0               | NEG          |                  | C           |                  |                      |
| 91         | 0               | NEG          |                  | C           |                  |                      |
| 92         | 0               | NEG          |                  | C           |                  |                      |
| 93         | 0               | NEG          |                  | C           |                  |                      |
| 95         | 0               | NEG          |                  | C           |                  |                      |
| 96         | 0               | NEG          |                  | C           |                  |                      |

**Supplemental Table 1.** Positive and negative RT-qPCR Cobas samples tested on RT-PCR Visby diagnostic device. **C** = concordant result; **NC** = Non-concordant results. INV= invalid result.
